# Supplementary material for: Lycium Barbarum Polysaccharides Protect Retina in rd1 Mice During Photoreceptor Degeneration
Source: PubMed Central journal article supplement — Invest Ophthalmol Vis Sci. 2018 Jan;59(1):597–611. doi: 10.1167/iovs.17-22881 (PMC6623178; doi:10.1167/iovs.17-22881), 2018-01
Supplement: iovs-59-01-30_s01.pdf [file iovs-59-01-30_s01.pdf]

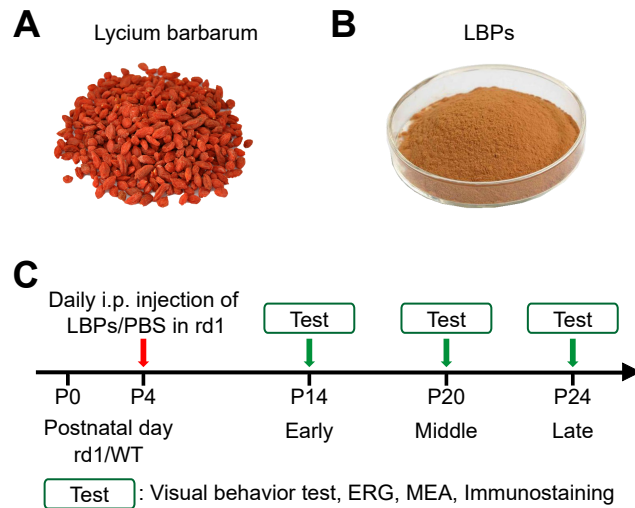

**Supplemental Figure 1. LBP and the experimental protocol.**

**A.** Picture of lycium barbarum or wolfberry. **B.** Picture of lycium barbarum polysaccharides (LBP). **C.** The experimental protocol. WT or rd1 mice were injected daily with LBP or PBS from postnatal day 4 (P4), and tested at P14, P20 and P24 corresponding to the early, middle and late stages of photoreceptor degeneration in rd1 mice, respectively.
