# Supplementary material for: Lycium Barbarum Polysaccharides Protect Retina in rd1 Mice During Photoreceptor Degeneration
Source: PubMed Central journal article supplement — Invest Ophthalmol Vis Sci. 2018 Jan;59(1):597–611. doi: 10.1167/iovs.17-22881 (PMC6623178; doi:10.1167/iovs.17-22881), 2018-01
Supplement: iovs-59-01-30_s03.pdf [file iovs-59-01-30_s03.pdf]

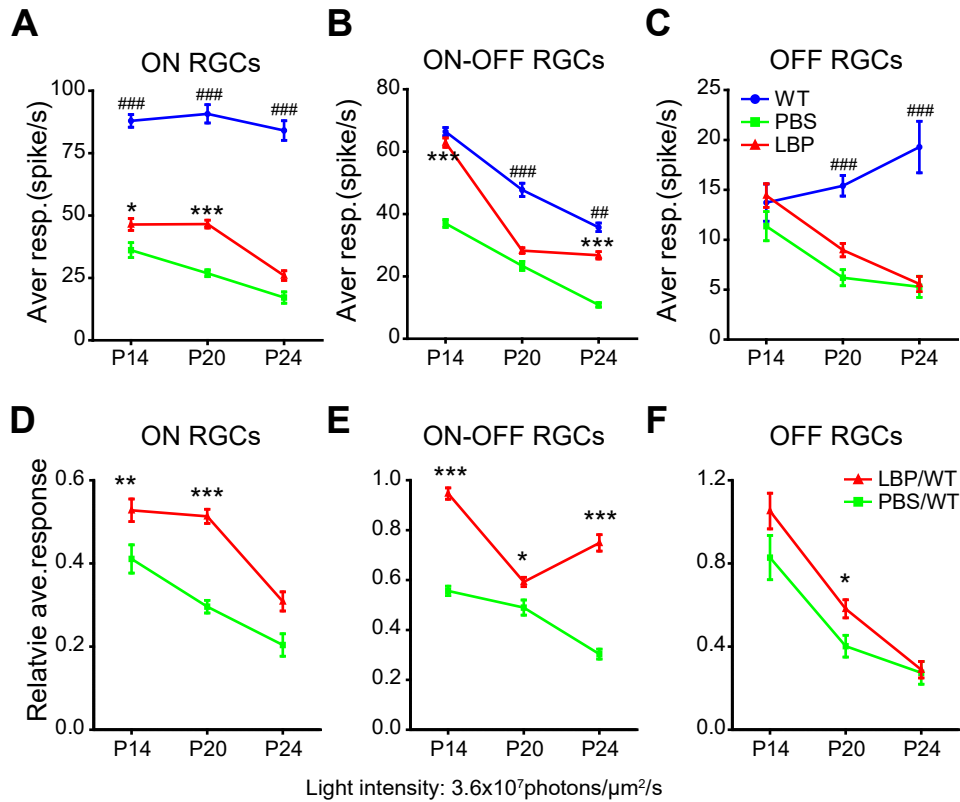

**Supplemental Figure 3. LBP treatment increases the average steady light responses of RGCs in rd1 retina. A-C.** The average light responses measured as the mean firing rate within 2 sec after light onset or offset in ON (A), ON-OFF (B) and OFF (C) RGCs of different animal groups. The average responses of rd1 cells were much smaller than those of WT controls. LBP treatment significantly improved the responses in ON and ON-OFF RGCs. **D-F.** Average responses of ON (D), ON-OFF (E) and OFF (F) RGCs of rd1 mice relative to those of WT counterparts. \* $p < 0.05$ , \*\* $p < 0.01$ , \*\*\* $p < 0.001$ , vs. untreated mice; and ## $p < 0.05$ , ### $p < 0.001$  vs. LBP-treated rd1 mice by two-way ANOVA.
